# Supplementary material for: Tetrazole conjoined organosilane and organosilatrane via the ‘click approach’: a potent Mycobacterium tuberculosis enoyl ACP reductase inhibitor and a dual sensor for Fe(iii) and Cu(ii) ions
Source: Royal Society of Chemistry journal article supplement (doi:10.1039/d1nj05126a), 2021-12-13
Supplement: d1nj05126a1.pdf [file d1nj05126a1.pdf]

**Tetrazole conjoined organosilane and organosilatrane via “click approach”: Potent Mycobacterium tuberculosis Enoyl- ACP reductase inhibitor and a dual sensor for Fe(III) and Cu(II) ions**

Gurjaspreet Singh<sup>a\*</sup>, Priyanka<sup>a\*</sup>, Sushma<sup>a</sup>, Pawan<sup>a</sup>, Diksha<sup>a</sup>, Suman<sup>a</sup>, Mohit<sup>a</sup>, Anita Devi<sup>a</sup>, Sofia Gupta<sup>a</sup>

<sup>a</sup>Department of Chemistry, Panjab University, Chandigarh-160014, India

\*Corresponding Authors

1. Prof. Gurjaspreet Singh

Department of Chemistry and Centre of Advanced Studies

Panjab University, Chandigarh, India

Email: [gjsingh@pu.ac.in](mailto:gjsingh@pu.ac.in)

2. Miss Priyanka

Research Scholar

Department of Chemistry and Centre of Advanced Studies

Panjab University, Chandigarh, India

Email: [priyankachem17@gmail.com](mailto:priyankachem17@gmail.com)

| <b>Entry</b>                                                                           | <b>Page No.</b> |
|----------------------------------------------------------------------------------------|-----------------|
| <sup>1</sup> H NMR spectrum of compound 1 (Fig.S1)                                     | 3               |
| <sup>1</sup> H NMR spectrum of compound 2 (Fig.S2)                                     | 3               |
| <sup>1</sup> H NMR spectrum of compound 3 (Fig.S3)                                     | 4               |
| <sup>13</sup> C NMR spectrum of compound 1 (Fig.S4)                                    | 4               |
| <sup>13</sup> C NMR spectrum of compound 2 (Fig.S5)                                    | 5               |
| <sup>13</sup> C NMR spectrum of compound 3 (Fig.S6)                                    | 5               |
| IR spectrum of compound 1 (Fig.S7)                                                     | 6               |
| IR spectrum of compound 2 (Fig.S8)                                                     | 6               |
| IR spectrum of compound 3 (Fig.S9)                                                     | 7               |
| Mass spectrum of compound 1 (Fig.S10)                                                  | 7               |
| Mass spectrum of compound 2 (Fig.S11)                                                  | 8               |
| Mass spectrum of compound 3 (Fig.S12)                                                  | 8               |
| IR spectrum of compound 3-Fe(III) complex (Fig.S13)                                    | 9               |
| 3D representation of intermolecular interaction in complex (compound 3/InhA) (Fig.S14) | 9               |

$^1\text{H}$  NMR spectrum of compound 1

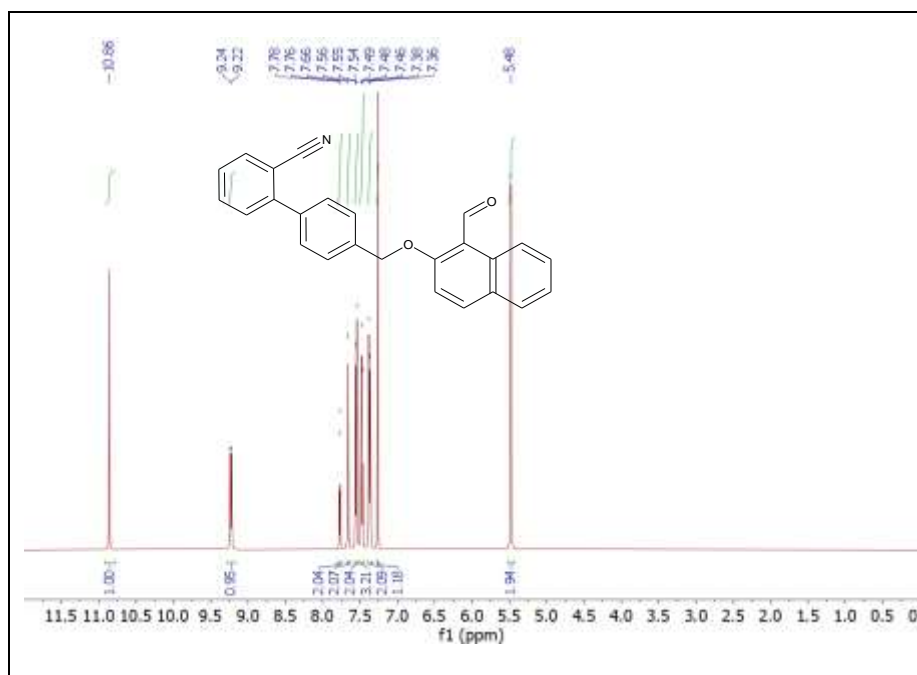

**Fig.S1.**  $^1\text{H}$  NMR spectrum of compound 1

$^1\text{H}$  NMR spectrum of compound 2

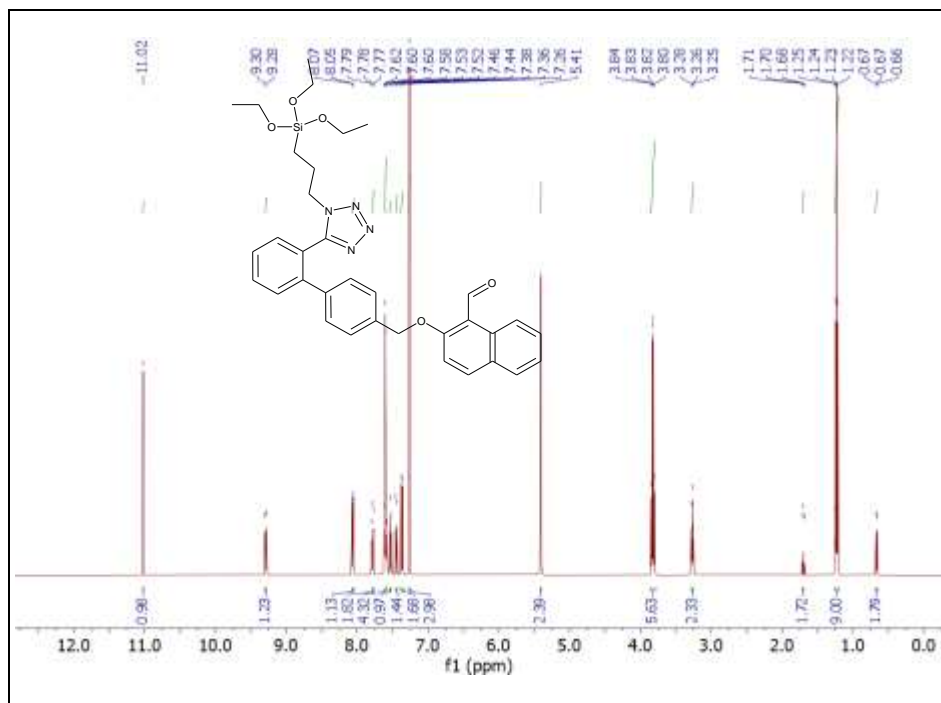

**Fig.S2.**  $^1\text{H}$  NMR spectrum of compound 2

$^1\text{H}$  NMR spectrum of compound 3

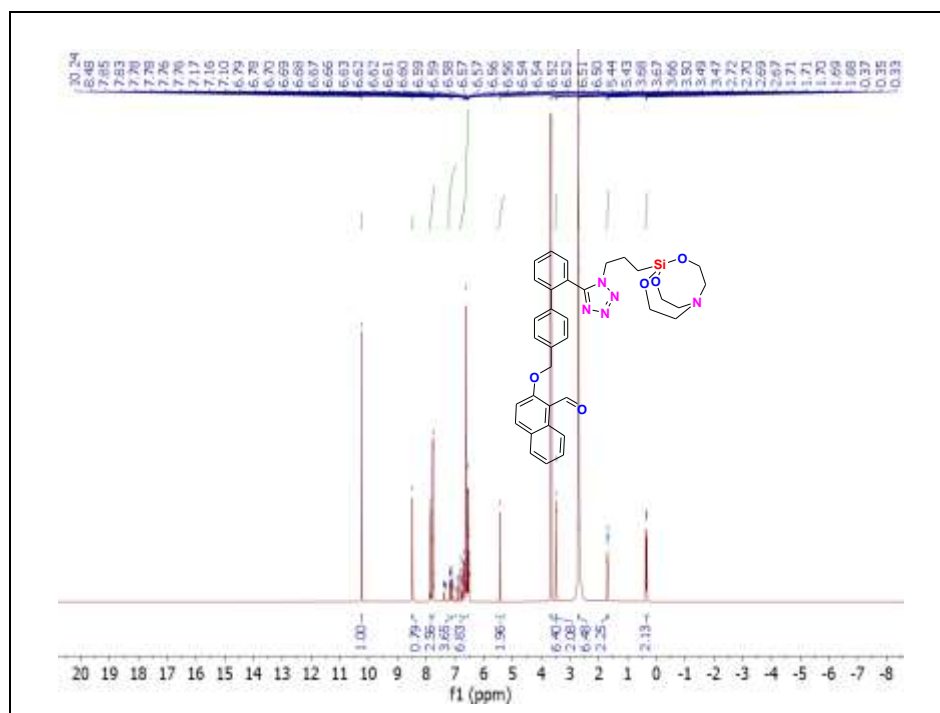

Fig.S3.  $^1\text{H}$  NMR spectrum of compound 3

$^{13}\text{C}$  NMR spectrum of compound 1

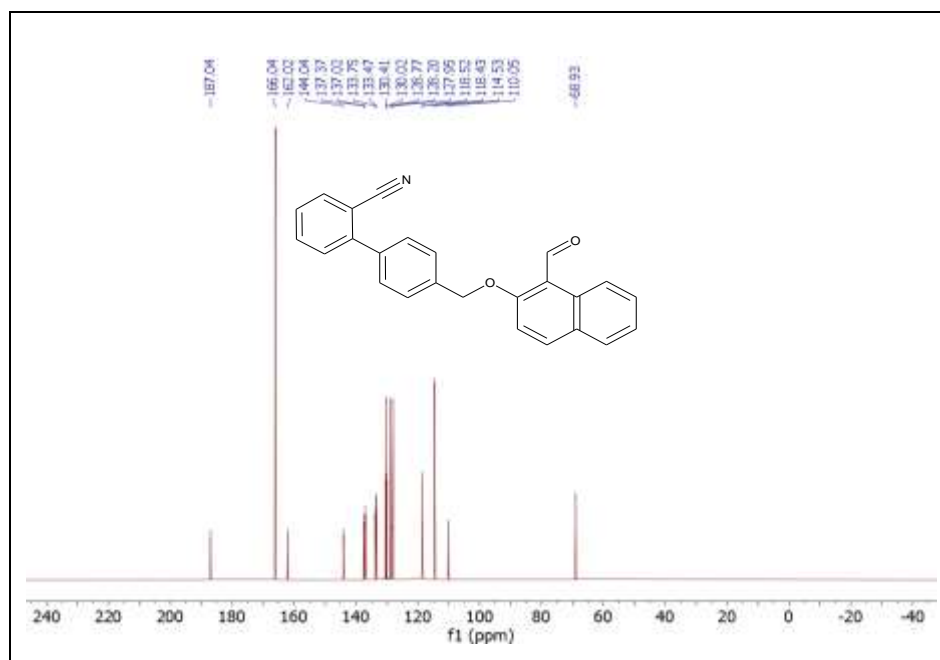

Fig.S4.  $^{13}\text{C}$  NMR spectrum of compound 1

$^{13}\text{C}$  NMR spectrum of compound 2

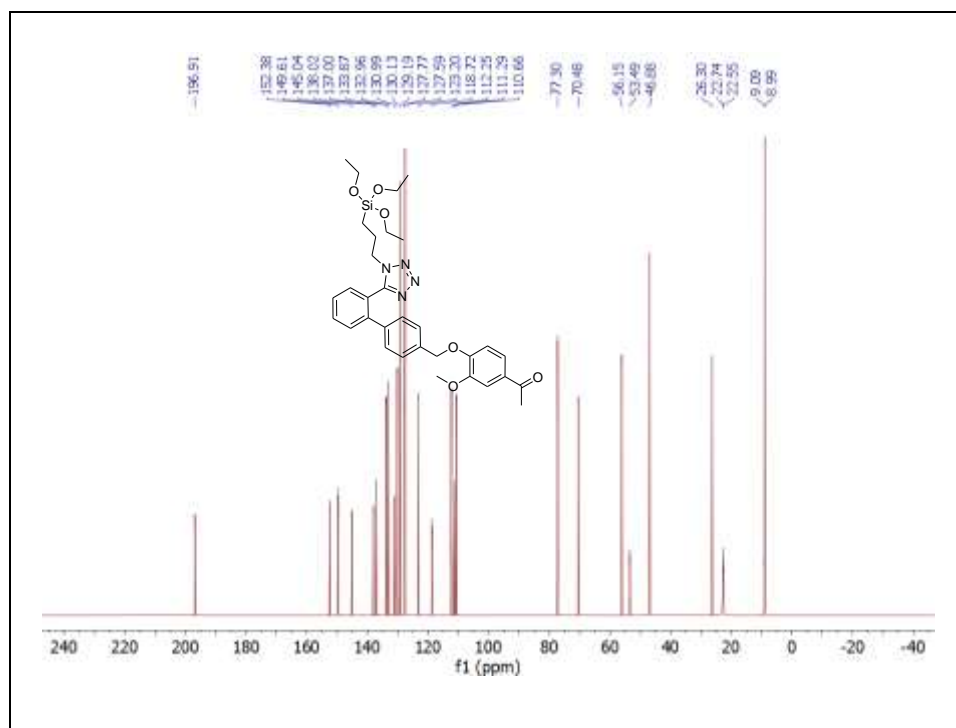

**Fig.S5.**  $^{13}\text{C}$  NMR spectrum of compound 2

$^{13}\text{C}$  NMR spectrum of compound 3

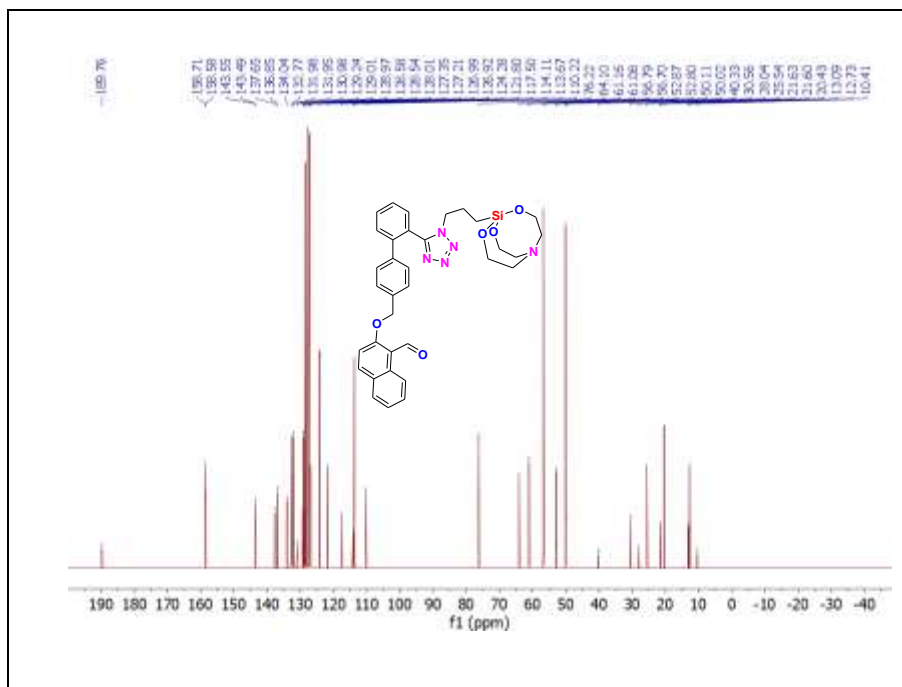

**Fig.S6.**  $^{13}\text{C}$  NMR spectrum of compound 3

IR spectrum of compound 1

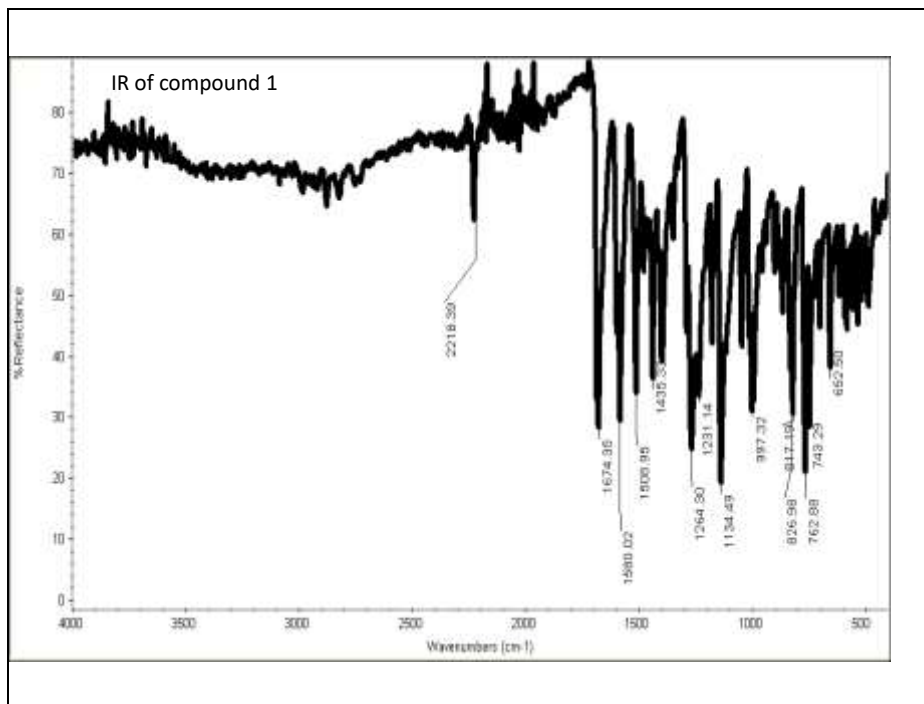

Fig.S7. IR spectrum of compound 1

IR spectrum of compound 2

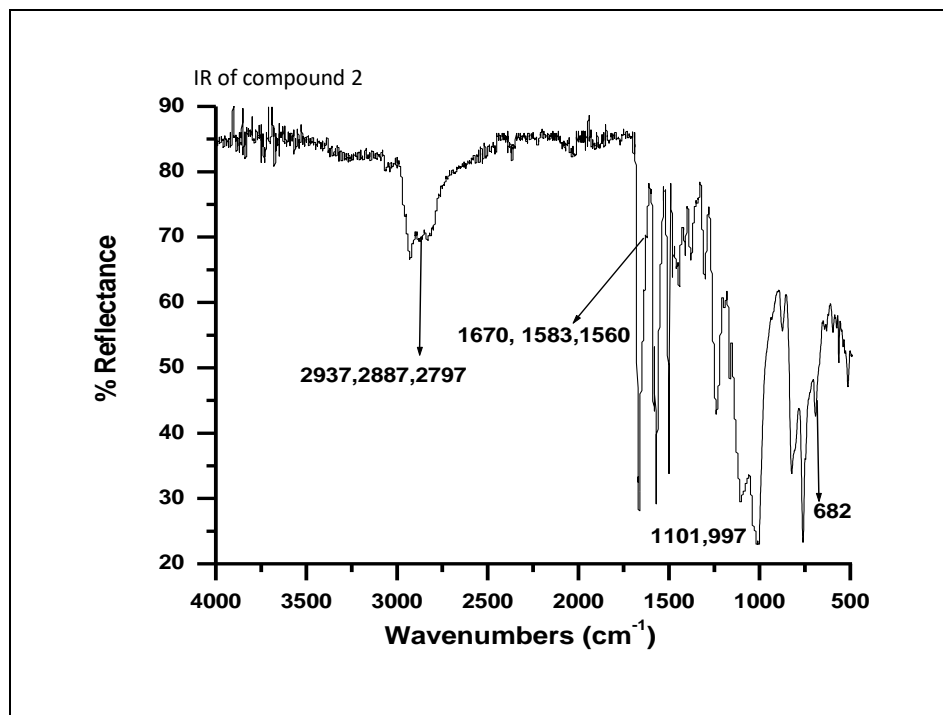

Fig.S8. IR spectrum of compound 2

IR spectrum of compound 3

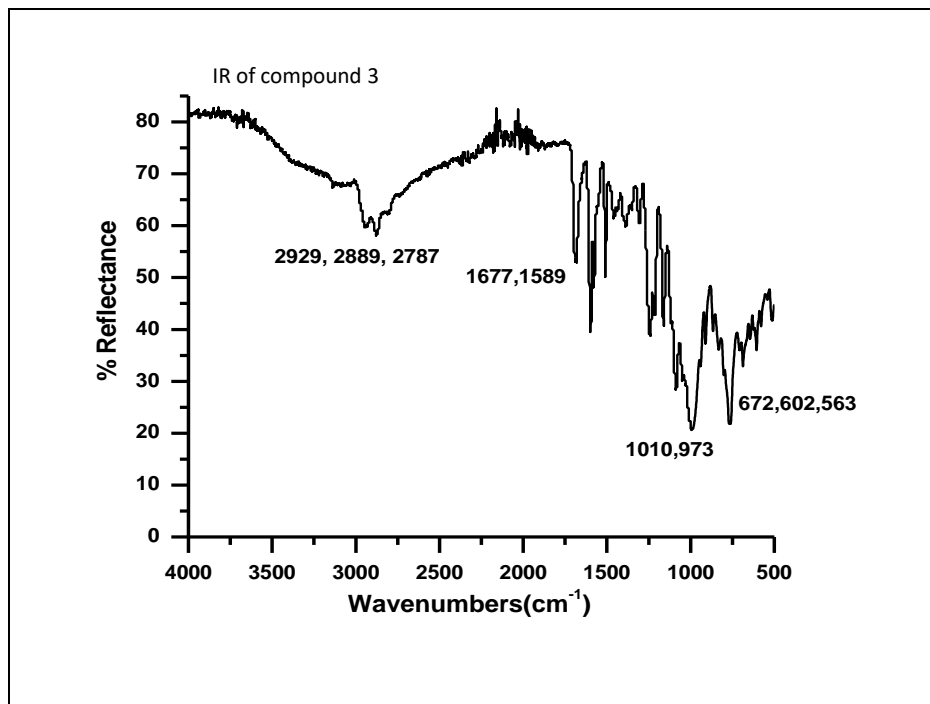

Fig.S9. IR spectrum of compound 3

Mass spectrum of compound 1

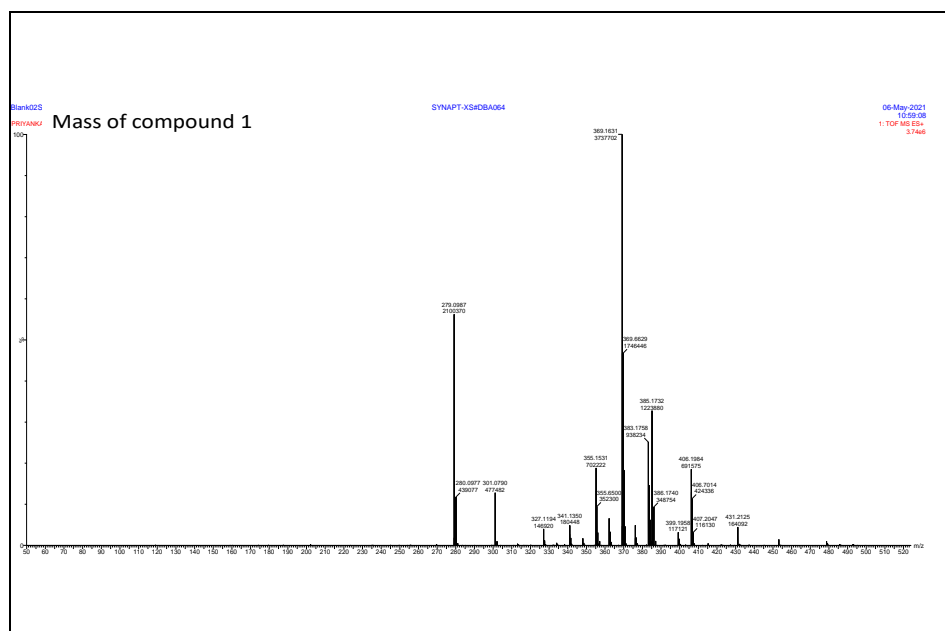

Fig.S10. Mass spectrum of compound 1

## Mass spectrum of compound 2

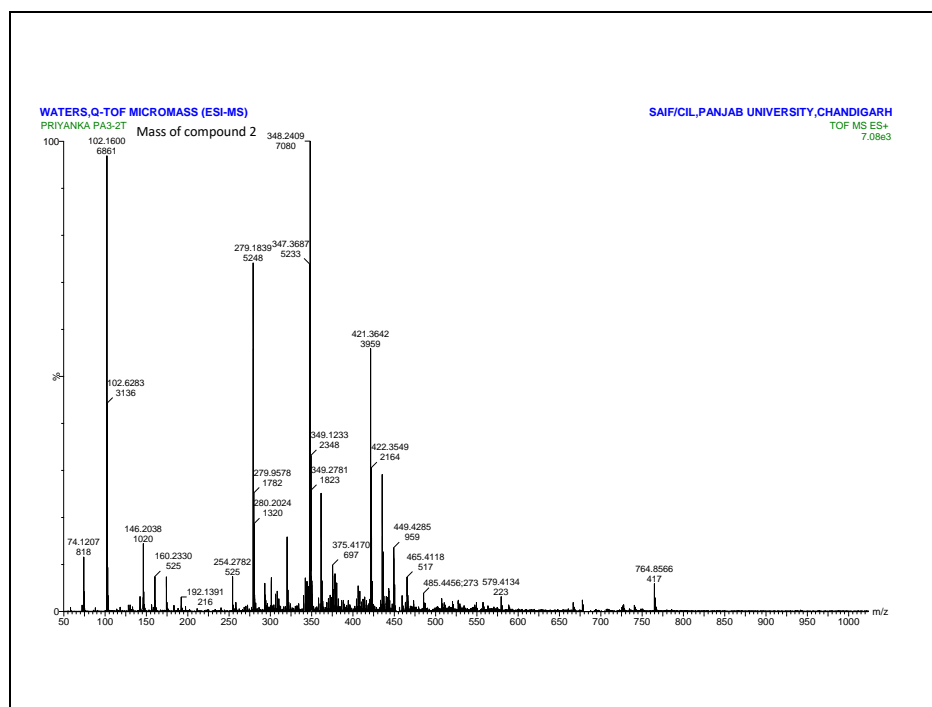

Fig.S11. Mass spectrum of compound 2

## Mass spectrum of compound 3

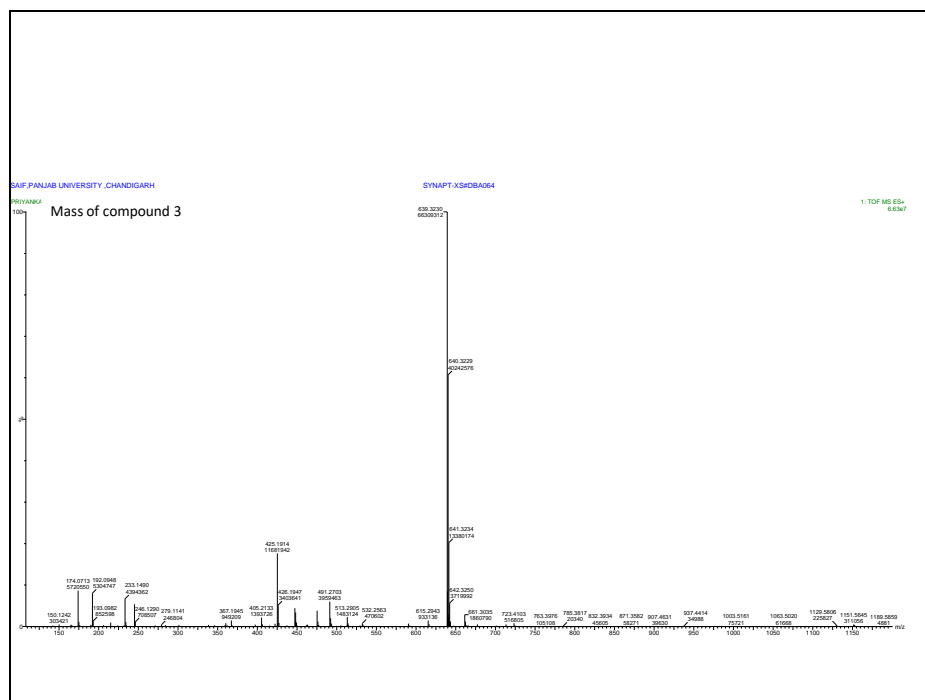

Fig.S12. Mass spectrum of compound 3



IR spectrum of compound 3-Fe(III) complex

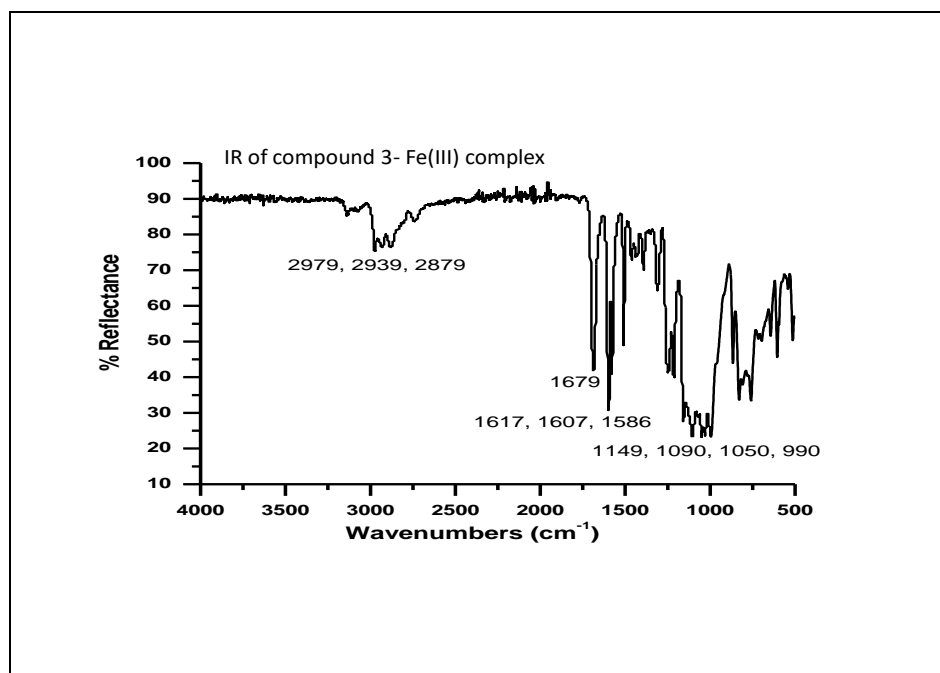

**Fig.S13.** IR spectrum of compound 3-Fe(III) complex

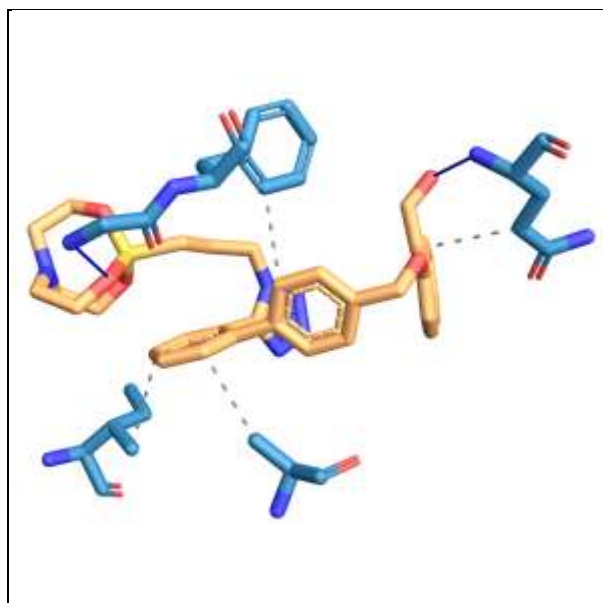

**Fig.S14.** Three dimensional representation of intermolecular interaction in complex (compound 3/InhA)
